# Supplementary material
Source: PubMed Central journal article supplement (PMC6136454)

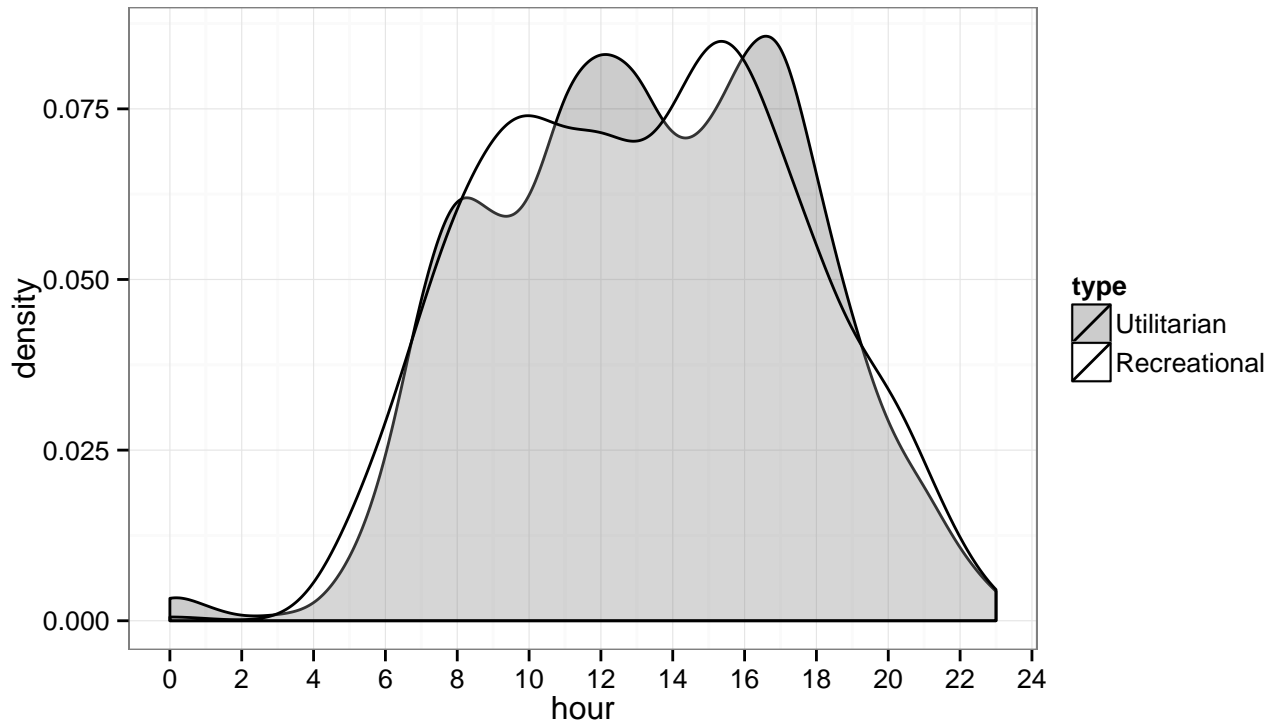

Supplement: NIHMS911477-supplement-Supplemental_Figure.pdf [file NIHMS911477-supplement-Supplemental_Figure.pdf]
